# Supplementary material for: The relationship between molecular structure and supramolecular morphology in the self-assembly of rod–coil molecules with oligoether chains
Source: Royal Society of Chemistry journal article supplement (doi:10.1039/d0sm00018c), 2020-01-01
Supplement: d0sm00018c1.pdf [file d0sm00018c1.pdf]

## Electronic Supplementary Information

### The Relationship between Molecular Structure and Supramolecular Morphology in the Self-Assembly of Rod-Coil Molecules with Oligoether Chains

Jie Lu,<sup>† a</sup> Shengsheng Yu,<sup>† b</sup> Zhaohua Li,<sup>a</sup> Myongsoo Lee,<sup>c</sup> Yuntian Yang,<sup>\*a</sup> Long Yi  
Jin<sup>\*a</sup>

<sup>[a]</sup>Department of Chemistry Yanbian University Yanji 133002, P.R. China E-mail:  
0000008547@ybu.edu.cn; lyjin@ybu.edu.cn;

<sup>[b]</sup>Department of Chemistry, Shandong University of Technology, Zibo, 255000, P.R.  
China;

<sup>[c]</sup>School of Chemistry, Jilin University, Changchun 130012, P.R. China

<sup>[†]</sup>These authors contributed equally to this work.

### Synthesis

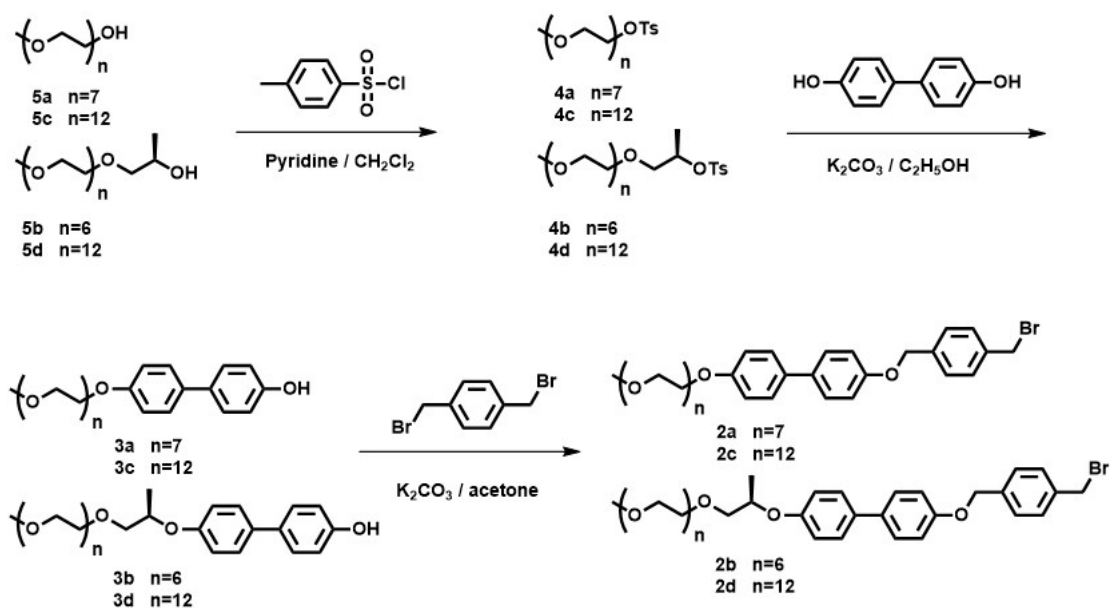

Scheme S1. Synthetic route of rod-coil molecules **1a-1d**.

**Compound 4a-4d:** Compounds **4a**, **4b**, **4c** and **4d** were all synthesized using the same procedure. A representative example is described for **4a**. The compound poly (ethylene glycol) methyl ether (Mw = 350) (12 g, 34.2 mmol), toluene-p-sulfonyl chloride (13 g, 68.5 mmol) and pyridine (25 mL) were put into 250 mL one-neck flask dissolved in dry CH<sub>2</sub>Cl<sub>2</sub> (60 mL). Room temperature for 12h, add distilled water to the reaction solution (60 mL), stirring 2h. Then add concentrated hydrochloric acid, significant acidity stirring 2h. The resulting solution was dried (MgSO<sub>4</sub>) and filtered. The solvent was removed in a rotary evaporator and the crude product was purified by column chromatography on silica gel using CH<sub>2</sub>Cl<sub>2</sub>, CH<sub>2</sub>Cl<sub>2</sub>:MeOH (20:1 v/v) as eluent to yield 12.5 g of colorless liquid (73.0%). <sup>1</sup>H NMR (300 MHz, CDCl<sub>3</sub>, δ, ppm): 7.80 (d, *J* = 9.0 Hz, 2H), 7.34 (d, *J* = 6.0 Hz, 2H), 4.16 (t, *J* = 6.0 Hz, 2H), 3.53-3.70 (m, 26H), 3.38 (s, 3H), 2.45 (s, 3H).

**Compound 4b:** Yellow liquid, yield 72.5%. <sup>1</sup>H NMR (300 MHz, CDCl<sub>3</sub>, δ, ppm): 7.80 (d, *J* = 9.0 Hz, 2H), 7.34 (d, *J* = 6.0 Hz, 2H), 4.67-4.73 (m,

1H), 3.52-3.66 (m, 26H), 3.38 (s, 3H), 2.45 (s, 3H), 1.28 (d,  $J = 6.0$  Hz, 3H).

**Compound 4c:** Colorless liquid, yield 74.5%.  $^1\text{H}$  NMR (300 MHz,  $\text{CDCl}_3$ ,  $\delta$ , ppm): 7.80 (d,  $J = 9.0$  Hz, 2H), 7.34 (d,  $J = 6.0$  Hz, 2H), 4.16 (t,  $J = 6.0$  Hz, 2H), 3.53-3.70 (m, 46H), 3.38 (s, 3H), 2.45 (s, 3H).

**Compound 4d:** Yellow liquid, yield 73.3%.  $^1\text{H}$  NMR (300 MHz,  $\text{CDCl}_3$ ,  $\delta$ , ppm): 7.80 (d,  $J = 9.0$  Hz, 2H), 7.34 (d,  $J = 6.0$  Hz, 2H), 4.67-4.73 (m, 1H), 3.52-3.66 (m, 50H), 3.38 (s, 3H), 2.45 (s, 3H), 1.28 (d,  $J = 6.0$  Hz, 3H).

**Compound 3a-3d:** Compounds **3a**, **3b**, **3c** and **3d** were all synthesized using the same procedure. A representative example is described for **3a**. Excess  $\text{K}_2\text{CO}_3$  (7.62 g, 53.5 mmol) and 4,4'-biphenol (7.71 g, 40.6 mmol) were dissolved in absolute ethyl alcohol (100 mL). Compound **4a** (6.8 g, 13.1 mmol) dissolved in absolute EtOH (30 mL) was added by drops into the above mixture for 5 h under reflux condition. The mixture was further refluxed for 24 h. The solvent was removed in a rotary evaporator. Water, a small amount of dilute  $\text{H}_2\text{SO}_4$  were added into the resulting mixture, extracted with ethyl acetate. The ethyl acetate solution was neutralized with  $\text{Na}_2\text{CO}_3$ , dried over anhydrous magnesium sulfate and filtered. After the solvent was removed in a rotary evaporator, the crude product was purified by silica gel chromatography to yield 4.2 g of a white solid (68.5%).  $^1\text{H}$  NMR (300 MHz,  $\text{CDCl}_3$ ,  $\delta$ , ppm): 7.37-7.43 (m, 4H), 6.87-6.94 (m, 4H), 6.65 (s, 1H), 4.13 (t,  $J = 6.0$  Hz, 2H), 3.86 (t,  $J = 6.0$  Hz, 2H), 3.54-3.74 (m, 24H), 3.38 (s, 3H).

**Compound 3b:** White solid, yield 64.3%.  $^1\text{H}$  NMR (300 MHz,  $\text{CDCl}_3$ ,  $\delta$ , ppm): 7.37-7.43 (m, 4H), 6.87-6.94 (m, 4H), 6.65 (s, 1H), 4.55-4.61 (m, 1H), 3.54-3.74 (m, 26H), 3.38 (s, 3H), 1.33 (d,  $J = 6.0$  Hz, 3H).

**Compound 3c:** White solid, yield 66.5%. <sup>1</sup>H NMR (300 MHz, CDCl<sub>3</sub>, δ, ppm) 7.37-7.43 (m, 4H), 6.87- 6.94 (m, 4H), 6.65 (s, 1H), 4.13 (t, *J* = 6.0 Hz, 2H), 3.86 (t, *J* = 6.0 Hz, 2H), 3.54-3.74 (m, 44H), 3.38 (s, 3H).

**Compound 3d:** White solid, yield 63.2%. <sup>1</sup>H NMR (300 MHz, CDCl<sub>3</sub>, δ, ppm): 7.37-7.43 (m, 4H), 6.87-6.94 (m, 4H), 6.65 (s, 1H), 4.55-4.61 (m, 1H), 3.54-3.74 (m, 50H), 3.38 (s, 3H), 1.33 (d, *J* = 6.0 Hz, 3H).

**Compound 2a-2d:** Compounds **2a**, **2b**, **2c** and **2d** were all synthesized using the same procedure. A representative example is described for **2a**. Excess K<sub>2</sub>CO<sub>3</sub> (1.68 g, 12.1 mmol) and α,α'-dibromo-p-xylene (2.348 g, 8.7 mmol) were dissolved in acetone (80 mL). Compound **3a** (1.4 g, 2.6 mmol) was added by drops into the above mixture for 2 h under reflux condition. The mixture was further refluxed for 22 h, filtered and concentrated by evaporation, then separated by chromatography on silica gel (CH<sub>2</sub>Cl<sub>2</sub>, EA, CH<sub>2</sub>Cl<sub>2</sub>:CH<sub>3</sub>OH = 20:1 as eluent). The desired compound was separated as the most polar fraction to yield 1.91 g of a wax-like white solid (85.6%). <sup>1</sup>H NMR (300 MHz, CDCl<sub>3</sub>, δ, ppm) 7.43-7.48 (m, 8H), 6.95-7.02 (m, 4H), 5.09 (s, 2H), 4.51 (s, 2H), 4.16 (t, *J* = 6.0 Hz, 2H), 3.87 (t, *J* = 6.0 Hz, 2H), 3.54-3.74 (m, 24H), 3.38 (s, 3H).

**Compound 2b:** White solid, yield 83.2%. <sup>1</sup>H NMR (300 MHz, CDCl<sub>3</sub>, δ, ppm) 7.43-7.48 (m, 8H), 6.95-7.02 (m, 4H), 5.09 (s, 2H), 4.55-4.61 (m, 1H), 4.51 (s, 2H), 3.54-3.74 (m, 26H), 3.38 (s, 3H), 1.33 (d, *J* = 6 Hz, 3H).

**Compound 2c:** White solid, yield 80.0%. <sup>1</sup>H NMR (300 MHz, CDCl<sub>3</sub>, δ, ppm) 7.43-7.48 (m, 8H), 6.95-7.02 (m, 4H), 5.09 (s, 2H), 4.51 (s, 2H), 4.16 (t, *J* = 6.0 Hz, 2H), 3.87 (t, *J* = 6.0 Hz, 2H), 3.54-3.74 (m, 44H), 3.38 (s, 3H).

**Compound 2d:** White solid, yield 76.2%.  $^1\text{H}$  NMR (300 MHz,  $\text{CDCl}_3$ ,  $\delta$ , ppm) 7.43-7.48 (m, 8H), 6.95-7.02 (m, 4H), 5.09 (s, 2H), 4.55-4.61 (m, 1H), 4.51 (s, 2H), 3.54-3.74 (m, 50H), 3.38 (s, 3H), 1.33 (d,  $J = 6.0$  Hz, 3H).

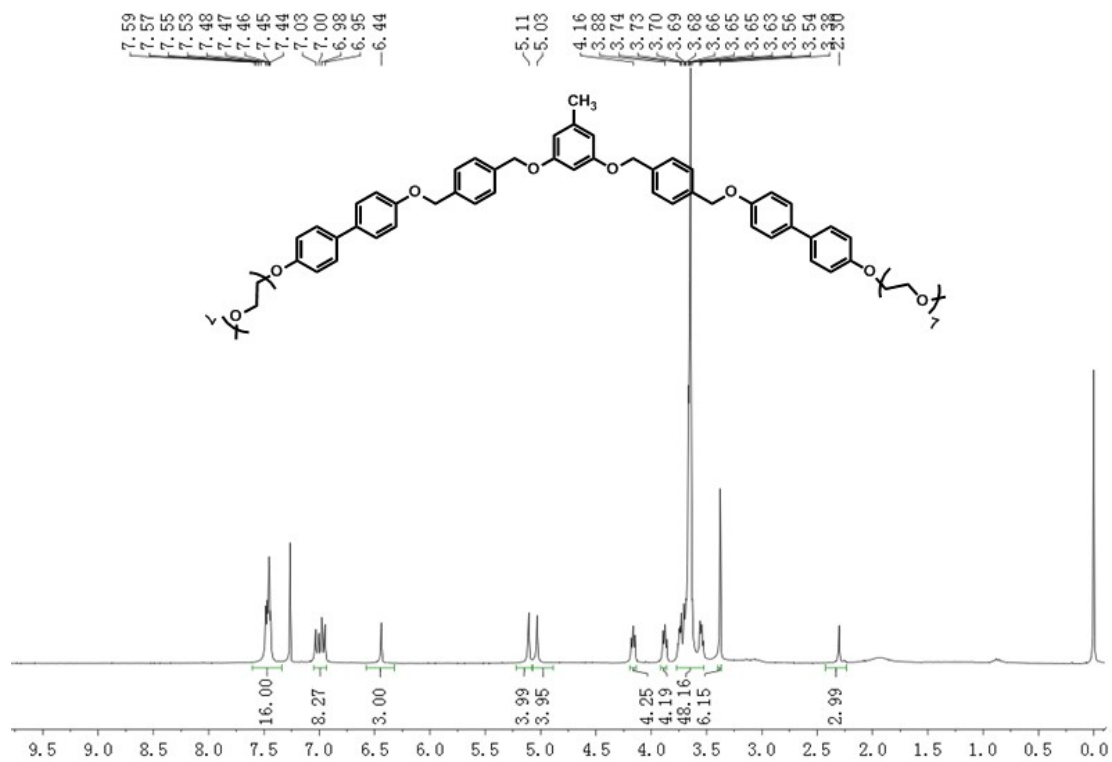

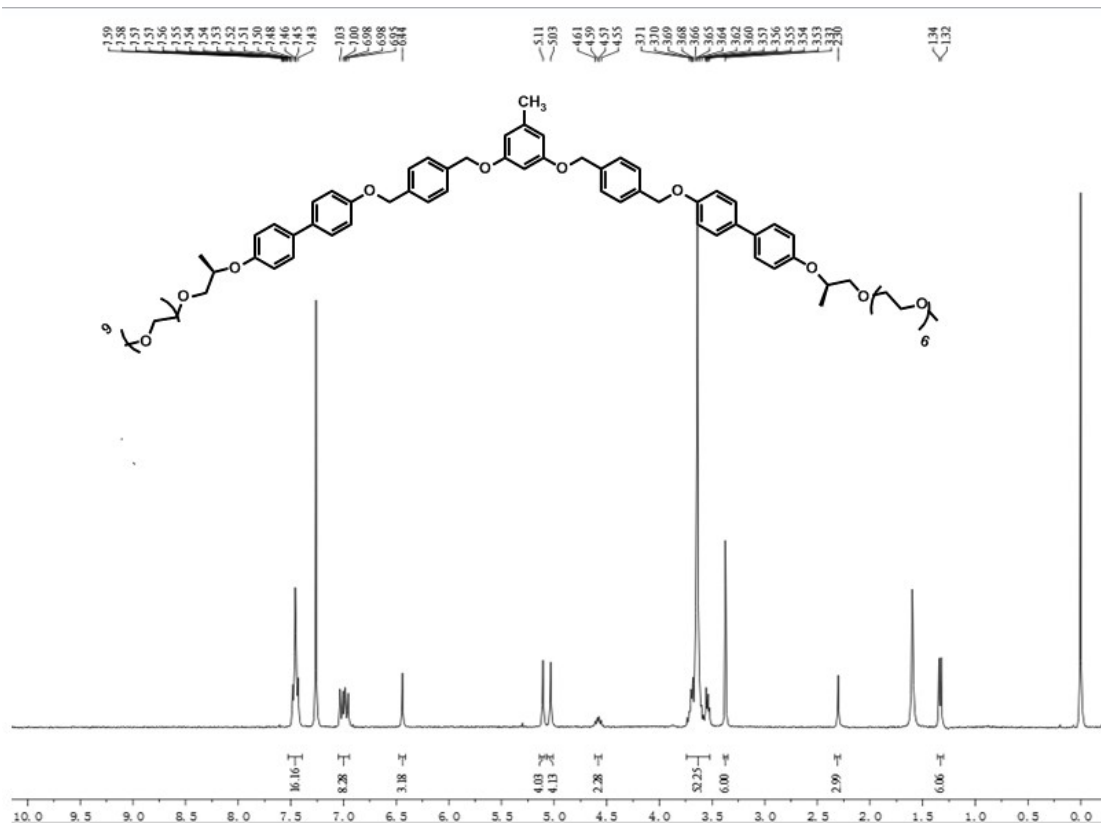

Figure S2.  $^1\text{H}$  NMR spectrum of molecule **1b** in  $\text{CDCl}_3$ .

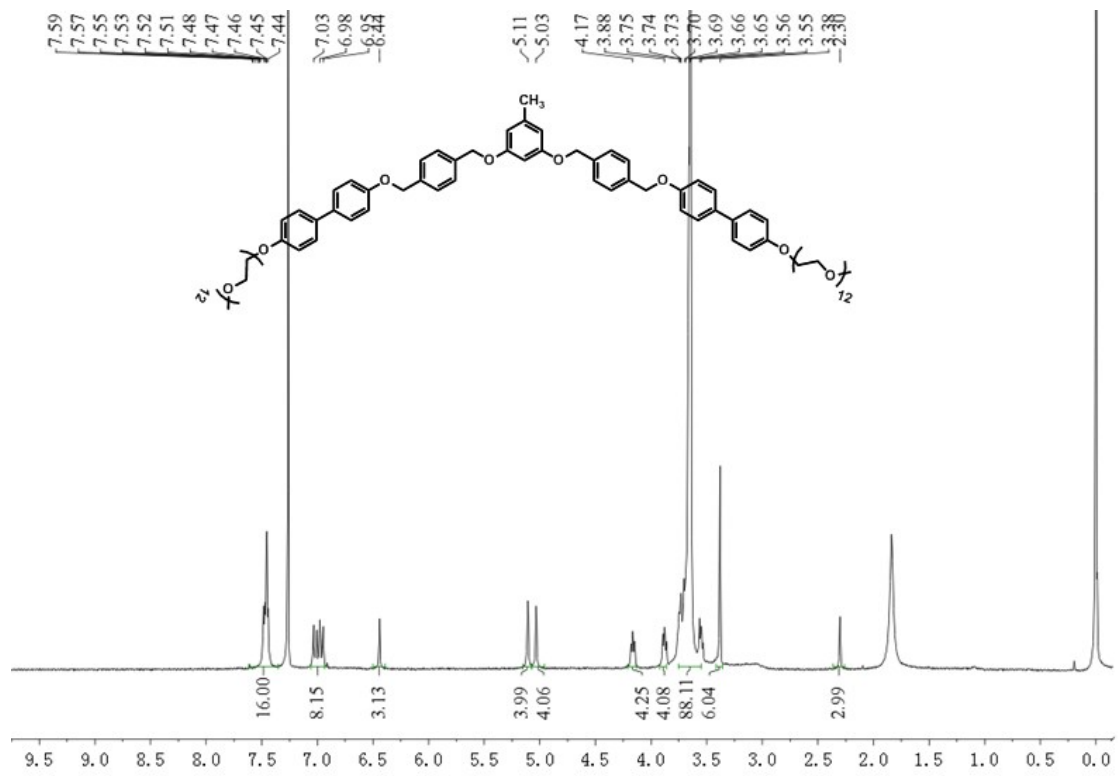

Figure S3.  $^1\text{H}$  NMR spectrum of molecule **1c** in  $\text{CDCl}_3$ .

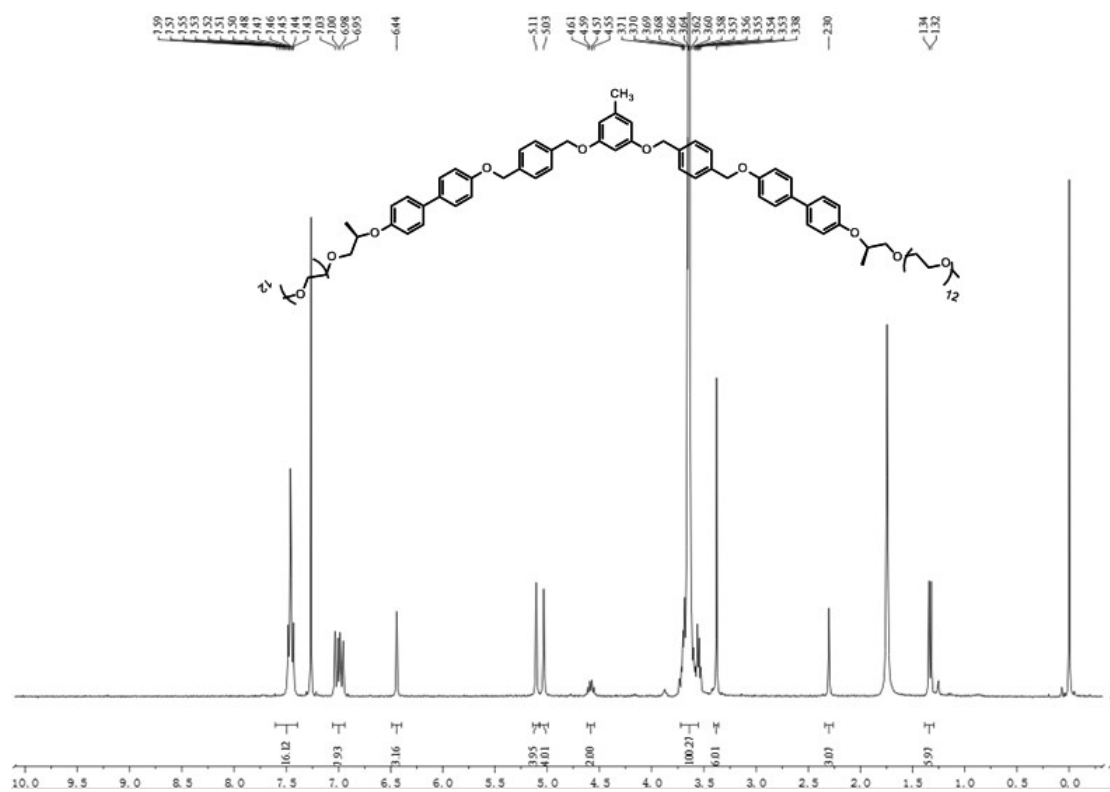

Figure S4.  $^1\text{H}$  NMR spectrum of molecule **1d** in  $\text{CDCl}_3$ .

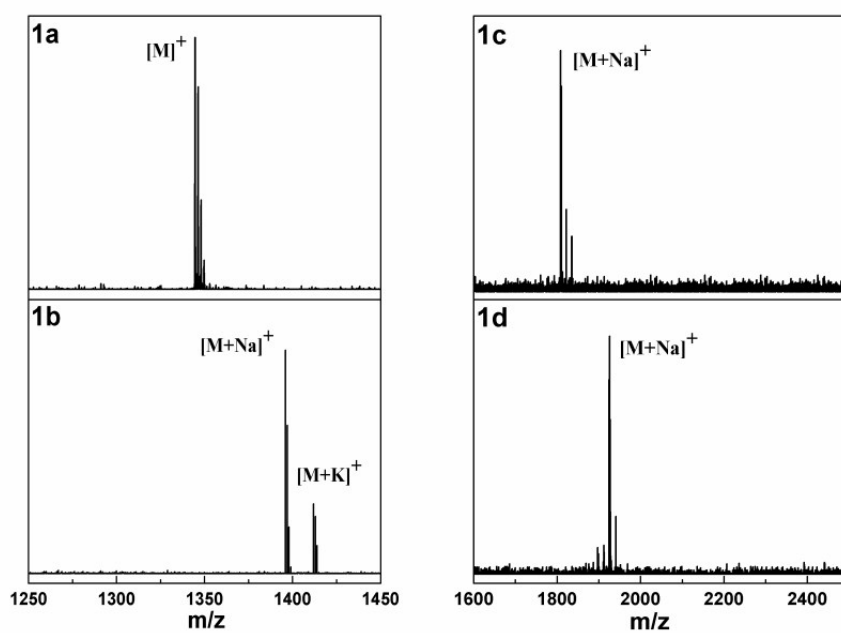



Figure S5. MALDI-TOF-MS spectra of **1a-1d** (matrix: CHCA)

**Table S1.** Thermal transitions of 1a-1d (data are from the second heating and the first cooling scans).

| Molecule  | Phase transition (°C)   |                       |                       |
|-----------|-------------------------|-----------------------|-----------------------|
|           | $f_{\text{coil}}^{[a]}$ | Heating               | Cooling               |
| <b>1a</b> | 0.504                   | Col <sub>o</sub> 96 i | i 85 Col <sub>o</sub> |
| <b>1b</b> | 0.515                   | Col <sub>o</sub> 88 i | i 78 Col <sub>o</sub> |
| <b>1c</b> | 0.627                   | Col <sub>h</sub> 78 i | i 70 Col <sub>h</sub> |
| <b>1d</b> | 0.650                   | k 64 i                | i 51 k                |

[a]  $f_{\text{coil}}$ : volume fraction of the coil-rod-coil molecule. Col<sub>o</sub>: oblique columnar phase. Col<sub>h</sub>: hexagonal columnar. i: isotropic phase. k: crystalline

**Table S2.** Small-angle X-ray diffraction data for oblique columnar structure for molecule **1a**.

| Mesophase<br>(lattice constants) | Reflections                       |                                    | Miller indices |
|----------------------------------|-----------------------------------|------------------------------------|----------------|
|                                  | $Q_{\text{obsd}}(\text{nm}^{-1})$ | $q_{\text{calcd}}(\text{nm}^{-1})$ |                |
|                                  | 0.89806                           | 0.89722                            | 100            |
| Col <sub>o</sub> at 65 °C        | 1.39375                           | 1.39563                            | 010            |
| a=7.56 nm;                       | 1.82281                           | 1.82070                            | 210            |
| b=4.82 nm;                       | 2.53464                           | 2.53646                            | 310            |
| $\gamma = 69^\circ$ .            |                                   |                                    |                |

**Table S3.** Small-angle X-ray diffraction data for oblique columnar structure for molecule **1b**.

| Mesophase<br>(lattice constants) | Reflections                       |                                    | Miller indices |
|----------------------------------|-----------------------------------|------------------------------------|----------------|
|                                  | $Q_{\text{obsd}}(\text{nm}^{-1})$ | $q_{\text{calcd}}(\text{nm}^{-1})$ |                |
|                                  | 0.93572                           | 0.93994                            | 100            |
| Col <sub>o</sub> at 50 °C        | 1.36024                           | 1.36715                            | 010            |
| a=7.06 nm;                       | 1.95618                           | 1.95059                            | 210            |
| b=4.85 nm;                       | 2.72385                           | 2.71969                            | 310            |
| $\gamma = 72^\circ$ .            |                                   |                                    |                |

**Table S4.** Small-angle X-ray diffraction data for oblique columnar structure for molecule **1c**.

| Mesophase<br>(lattice constants) | Reflections                       |                                    | Miller indices |
|----------------------------------|-----------------------------------|------------------------------------|----------------|
|                                  | $Q_{\text{obsd}}(\text{nm}^{-1})$ | $q_{\text{calcd}}(\text{nm}^{-1})$ |                |
|                                  | 0.65560                           | 0.65512                            | 100            |
| Col <sub>h</sub> at 45 °C        | 1.13493                           | 1.13931                            | 110            |
| a=11.06 nm;                      | 1.31805                           | 1.31019                            | 210            |

**Table S5.** Summary of SAXS data for **1a-1d** in the bulk state.

| Molecule  | Crystalline phase      |                        |               |              |
|-----------|------------------------|------------------------|---------------|--------------|
|           | <u>Col<sub>h</sub></u> | <u>Col<sub>0</sub></u> |               |              |
|           | <i>a</i> (nm)          | <i>a</i> (nm)          | <i>b</i> (nm) | $\gamma$ (°) |
| <b>1a</b> | —                      | 7.6                    | 4.8           | 69           |
| <b>1b</b> | —                      | 7.1                    | 4.9           | 72           |
| <b>1c</b> | 11.1                   | —                      | —             | —            |
| <b>1d</b> | —                      | —                      | —             | —            |

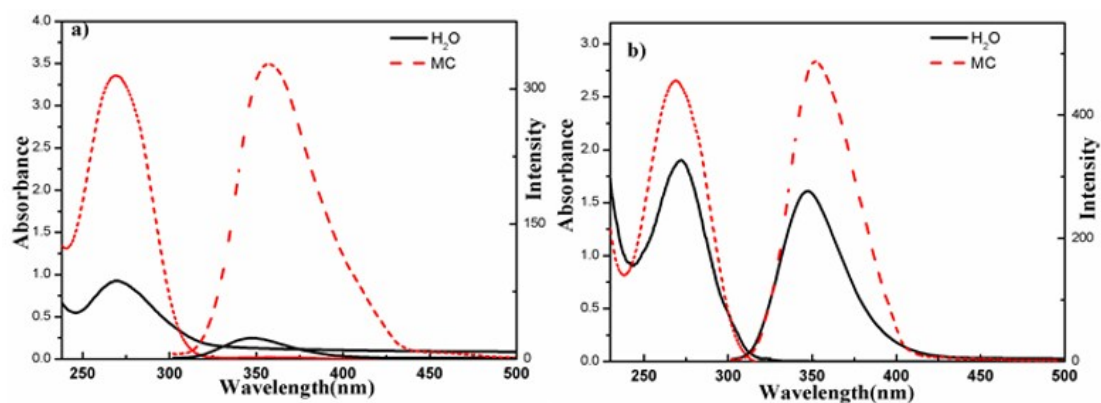

Figure S6. Absorption and emission spectra of a) **1b**; b) **1d** in methylene chloride and aqueous solution (0.01 wt%).

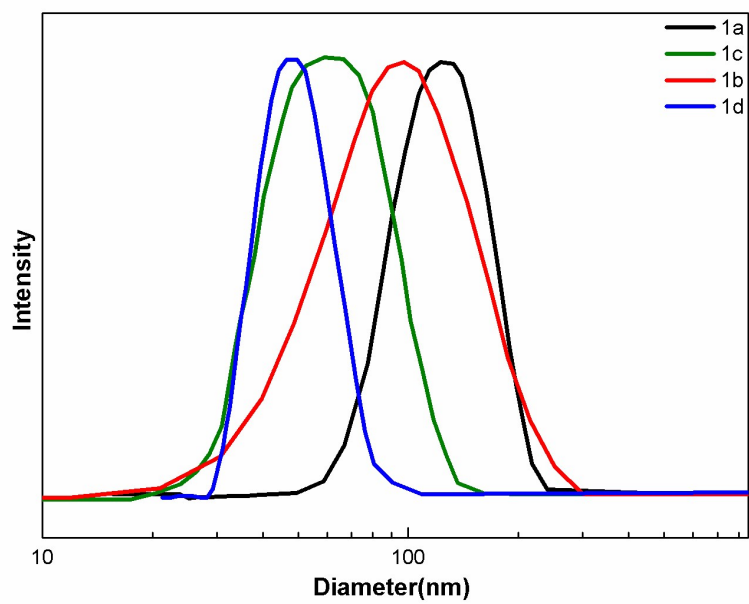

Figure S7. Size distribution graphs of aqueous solutions of **1a-1d** (0.01 wt%) from DLS measurements.
